# Supplementary material for: Groupwise image registration based on a total correlation dissimilarity measure for quantitative MRI and dynamic imaging data
Source: PubMed Central journal article supplement (PMC6117310; doi:10.1038/s41598-018-31474-7), 2018-08-30
Supplement: 41598_2018_31474_MOESM1_ESM.pdf [file 41598_2018_31474_MOESM1_ESM.pdf]

## Supplementary information

Groupwise image registration based on a total correlation  
dissimilarity measure for quantitative MRI  
and dynamic imaging data

*Jean-Marie Guyader, Wyke Huizinga, Dirk H. J. Poot,  
Matthijs van Kranenburg, André Uitterdijk,  
Wiro J. Niessen, Stefan Klein*

Cells with grey background are already included in the main article.

Table S1: TIMOLLI-HEART. Mean and standard deviation over all subjects for all evaluation measures and control point spacings 32 mm, 64 mm and 128 mm, and for reference images 1, 4, 7 and 11.

| (a) Dice [%]         |         |         |         |         |         |         |         |         |         |         |         |        |
|----------------------|---------|---------|---------|---------|---------|---------|---------|---------|---------|---------|---------|--------|
|                      | 32      |         |         |         | 64      |         |         |         | 128     |         |         |        |
|                      | 1       | 4       | 7       | 11      | 1       | 4       | 7       | 11      | 1       | 4       | 7       | 11     |
| Mis.                 | 48 ± 8  | 48 ± 8  | 48 ± 8  | 48 ± 8  | 48 ± 8  | 48 ± 8  | 48 ± 8  | 48 ± 8  | 48 ± 8  | 48 ± 8  | 48 ± 8  | 48 ± 8 |
| $\mathcal{D}_{MI}$   | 26 ± 11 | 22 ± 10 | 22 ± 15 | 39 ± 14 | 37 ± 11 | 34 ± 16 | 19 ± 15 | 52 ± 7  | 44 ± 14 | 40 ± 13 | 24 ± 17 | 51 ± 7 |
| $\mathcal{D}_{PCA}$  | 54 ± 9  | 54 ± 9  | 54 ± 9  | 54 ± 9  | 53 ± 7  | 53 ± 7  | 53 ± 7  | 53 ± 8  | 51 ± 9  | 50 ± 9  | 51 ± 9  | 51 ± 9 |
| $\mathcal{D}_{PCA2}$ | 52 ± 13 | 52 ± 13 | 52 ± 13 | 52 ± 13 | 52 ± 11 | 52 ± 10 | 52 ± 11 | 53 ± 10 | 52 ± 7  | 52 ± 8  | 52 ± 8  | 52 ± 8 |
| $\mathcal{D}_{TC}$   | 52 ± 13 | 52 ± 12 | 52 ± 13 | 53 ± 13 | 53 ± 11 | 53 ± 11 | 53 ± 11 | 53 ± 11 | 53 ± 7  | 53 ± 8  | 54 ± 7  | 53 ± 8 |

  

| (b) $STD_{ \partial T_g / \partial x }$ [%] |        |        |        |        |       |       |       |       |       |       |       |       |
|---------------------------------------------|--------|--------|--------|--------|-------|-------|-------|-------|-------|-------|-------|-------|
|                                             | 32     |        |        |        | 64    |       |       |       | 128   |       |       |       |
|                                             | 1      | 4      | 7      | 11     | 1     | 4     | 7     | 11    | 1     | 4     | 7     | 11    |
| Mis.                                        | 0 ± 0  | 0 ± 0  | 0 ± 0  | 0 ± 0  | 0 ± 0 | 0 ± 0 | 0 ± 0 | 0 ± 0 | 0 ± 0 | 0 ± 0 | 0 ± 0 | 0 ± 0 |
| $\mathcal{D}_{MI}$                          | 24 ± 8 | 28 ± 8 | 29 ± 9 | 10 ± 4 | 7 ± 2 | 7 ± 2 | 8 ± 3 | 3 ± 1 | 1 ± 0 | 1 ± 0 | 1 ± 0 | 1 ± 0 |
| $\mathcal{D}_{PCA}$                         | 6 ± 4  | 4 ± 2  | 4 ± 2  | 4 ± 1  | 2 ± 1 | 1 ± 1 | 2 ± 1 | 1 ± 1 | 0 ± 0 | 0 ± 0 | 0 ± 0 | 0 ± 0 |
| $\mathcal{D}_{PCA2}$                        | 6 ± 2  | 5 ± 2  | 6 ± 2  | 4 ± 1  | 1 ± 1 | 1 ± 1 | 2 ± 1 | 1 ± 1 | 0 ± 0 | 0 ± 0 | 0 ± 0 | 0 ± 0 |
| $\mathcal{D}_{TC}$                          | 7 ± 3  | 6 ± 3  | 7 ± 3  | 5 ± 1  | 2 ± 1 | 2 ± 1 | 2 ± 1 | 1 ± 1 | 0 ± 0 | 0 ± 0 | 0 ± 0 | 0 ± 0 |

  

| (c) 90% $\sqrt{CRLB}$ $T_1$ [ms] |          |          |           |         |         |          |          |         |         |         |          |         |
|----------------------------------|----------|----------|-----------|---------|---------|----------|----------|---------|---------|---------|----------|---------|
|                                  | 32       |          |           |         | 64      |          |          |         | 128     |         |          |         |
|                                  | 1        | 4        | 7         | 11      | 1       | 4        | 7        | 11      | 1       | 4       | 7        | 11      |
| Mis.                             | 92 ± 19  | 92 ± 19  | 92 ± 19   | 92 ± 19 | 92 ± 19 | 92 ± 19  | 92 ± 19  | 92 ± 19 | 92 ± 19 | 92 ± 19 | 92 ± 19  | 92 ± 19 |
| $\mathcal{D}_{MI}$               | 119 ± 26 | 157 ± 61 | 467 ± 610 | 93 ± 19 | 97 ± 16 | 103 ± 18 | 146 ± 52 | 83 ± 13 | 91 ± 14 | 95 ± 16 | 121 ± 29 | 81 ± 12 |
| $\mathcal{D}_{PCA}$              | 83 ± 17  | 79 ± 17  | 78 ± 11   | 85 ± 16 | 87 ± 16 | 84 ± 20  | 83 ± 13  | 85 ± 13 | 88 ± 14 | 89 ± 21 | 103 ± 50 | 85 ± 10 |
| $\mathcal{D}_{PCA2}$             | 81 ± 15  | 79 ± 16  | 79 ± 12   | 79 ± 12 | 83 ± 12 | 79 ± 14  | 80 ± 10  | 81 ± 10 | 84 ± 12 | 82 ± 15 | 82 ± 10  | 81 ± 11 |
| $\mathcal{D}_{TC}$               | 77 ± 14  | 75 ± 11  | 73 ± 14   | 74 ± 12 | 77 ± 13 | 75 ± 11  | 73 ± 13  | 74 ± 11 | 79 ± 12 | 76 ± 11 | 76 ± 13  | 75 ± 11 |

Table S2: T1VFA-CAROTID. Means and standard deviation over all subjects for all evaluation measures and control point spacings 8 mm, 16 mm and 32 mm.

| (a) mTRE [mm]        |             |             |             |
|----------------------|-------------|-------------|-------------|
|                      | 8           | 16          | 32          |
| Mis.                 | 1.47 ± 0.54 | 1.47 ± 0.54 | 1.47 ± 0.54 |
| $\mathcal{D}_{MI}$   | 1.26 ± 0.44 | 1.22 ± 0.43 | 1.23 ± 0.45 |
| $\mathcal{D}_{PCA}$  | 1.25 ± 0.56 | 1.11 ± 0.42 | 1.10 ± 0.43 |
| $\mathcal{D}_{PCA2}$ | 1.13 ± 0.46 | 1.08 ± 0.39 | 1.10 ± 0.43 |
| $\mathcal{D}_{TC}$   | 1.19 ± 0.50 | 1.09 ± 0.40 | 1.10 ± 0.42 |

  

| (b) $STD_{ \partial T_g / \partial x }$ [%] |       |       |       |
|---------------------------------------------|-------|-------|-------|
|                                             | 8     | 16    | 32    |
| Mis.                                        | 0 ± 0 | 0 ± 0 | 0 ± 0 |
| $\mathcal{D}_{MI}$                          | 7 ± 1 | 2 ± 0 | 0 ± 0 |
| $\mathcal{D}_{PCA}$                         | 6 ± 1 | 2 ± 1 | 0 ± 0 |
| $\mathcal{D}_{PCA2}$                        | 5 ± 1 | 1 ± 0 | 0 ± 0 |
| $\mathcal{D}_{TC}$                          | 6 ± 1 | 1 ± 0 | 0 ± 0 |

  

| (c) 90% $\sqrt{CRLB}$ $T_1$ [ms] |           |           |          |
|----------------------------------|-----------|-----------|----------|
|                                  | 8         | 16        | 32       |
| Mis.                             | > 1000    | > 1000    | > 1000   |
| $\mathcal{D}_{MI}$               | 530 ± 136 | 501 ± 83  | 523 ± 93 |
| $\mathcal{D}_{PCA}$              | 540 ± 154 | 498 ± 93  | 530 ± 94 |
| $\mathcal{D}_{PCA2}$             | 532 ± 154 | 510 ± 110 | 523 ± 87 |
| $\mathcal{D}_{TC}$               | 533 ± 150 | 500 ± 96  | 528 ± 96 |

Table S5: DTI-BRAIN. Mean and standard deviation of the 90%  $\sqrt{CRLB}$  MD [ $\mu m^2/ms$ ] over all subjects.

| Affine               |               |
|----------------------|---------------|
| Mis.                 | 0.096 ± 0.029 |
| $\mathcal{D}_{MI}$   | 0.084 ± 0.028 |
| $\mathcal{D}_{PCA}$  | 0.085 ± 0.029 |
| $\mathcal{D}_{PCA2}$ | 0.084 ± 0.028 |
| $\mathcal{D}_{TC}$   | 0.085 ± 0.029 |

Table S3: ADC-ABDOMEN. Mean and standard deviation over all subjects for all evaluation measures and control point spacings of 32 mm, 64 mm and 128 mm.

| (a) Dice [%]         |         |         |        |        |        |        |
|----------------------|---------|---------|--------|--------|--------|--------|
|                      | 32      |         | 64     |        | 128    |        |
|                      | 32      | 64      | 32     | 64     | 32     | 64     |
| Mis.                 | 70 ± 4  | 70 ± 4  | 70 ± 4 | 70 ± 4 | 70 ± 4 | 70 ± 4 |
| $\mathcal{D}_{MI}$   | 61 ± 18 | 64 ± 16 | 73 ± 8 | 73 ± 8 | 73 ± 8 | 73 ± 8 |
| $\mathcal{D}_{PCA}$  | 65 ± 13 | 71 ± 5  | 71 ± 4 | 71 ± 4 | 71 ± 4 | 71 ± 4 |
| $\mathcal{D}_{PCA2}$ | 75 ± 7  | 75 ± 5  | 73 ± 5 | 73 ± 5 | 73 ± 5 | 73 ± 5 |
| $\mathcal{D}_{TC}$   | 72 ± 6  | 74 ± 5  | 73 ± 5 | 73 ± 5 | 73 ± 5 | 73 ± 5 |

  

| (b) $STD_{ \partial T_g / \partial x }$ [%] |         |       |       |       |       |       |
|---------------------------------------------|---------|-------|-------|-------|-------|-------|
|                                             | 32      |       | 64    |       | 128   |       |
|                                             | 32      | 64    | 32    | 64    | 32    | 64    |
| Mis.                                        | 0 ± 0   | 0 ± 0 | 0 ± 0 | 0 ± 0 | 0 ± 0 | 0 ± 0 |
| $\mathcal{D}_{MI}$                          | 25 ± 11 | 8 ± 3 | 2 ± 1 | 2 ± 1 | 2 ± 1 | 2 ± 1 |
| $\mathcal{D}_{PCA}$                         | 11 ± 3  | 3 ± 1 | 1 ± 0 | 1 ± 0 | 1 ± 0 | 1 ± 0 |
| $\mathcal{D}_{PCA2}$                        | 8 ± 2   | 3 ± 1 | 0 ± 0 | 0 ± 0 | 0 ± 0 | 0 ± 0 |
| $\mathcal{D}_{TC}$                          | 16 ± 5  | 5 ± 2 | 1 ± 0 | 1 ± 0 | 1 ± 0 | 1 ± 0 |

  

| (c) 90% $\sqrt{CRLB}$ ADC [ $\mu m^2/ms$ ] |             |             |             |             |             |             |
|--------------------------------------------|-------------|-------------|-------------|-------------|-------------|-------------|
|                                            | 32          |             | 64          |             | 128         |             |
|                                            | 32          | 64          | 32          | 64          | 32          | 64          |
| Mis.                                       | 0.24 ± 0.06 | 0.25 ± 0.05 | 0.29 ± 0.05 | 0.29 ± 0.05 | 0.29 ± 0.05 | 0.29 ± 0.05 |
| $\mathcal{D}_{MI}$                         | 0.20 ± 0.08 | 0.23 ± 0.10 | 0.35 ± 0.16 | 0.35 ± 0.16 | 0.35 ± 0.16 | 0.35 ± 0.16 |
| $\mathcal{D}_{PCA}$                        | 0.15 ± 0.04 | 0.23 ± 0.06 | 0.46 ± 0.27 | 0.46 ± 0.27 | 0.46 ± 0.27 | 0.46 ± 0.27 |
| $\mathcal{D}_{PCA2}$                       | 0.23 ± 0.03 | 0.27 ± 0.05 | 0.41 ± 0.18 | 0.41 ± 0.18 | 0.41 ± 0.18 | 0.41 ± 0.18 |
| $\mathcal{D}_{TC}$                         | 0.33 ± 0.05 | 0.32 ± 0.05 | 0.38 ± 0.14 | 0.38 ± 0.14 | 0.38 ± 0.14 | 0.38 ± 0.14 |

Table S6: CT-LUNG. Mean and standard deviation over all subjects for all evaluation measures and control point spacings 6 mm, 13 mm and 20 mm.

| (a) mTRE [mm]        |             |             |             |             |             |             |
|----------------------|-------------|-------------|-------------|-------------|-------------|-------------|
|                      | 6           |             | 13          |             | 20          |             |
|                      | 6           | 13          | 6           | 13          | 6           | 13          |
| Mis.                 | 6.72 ± 2.51 | 6.72 ± 2.51 | 6.72 ± 2.51 | 6.72 ± 2.51 | 6.72 ± 2.51 | 6.72 ± 2.51 |
| $\mathcal{D}_{MI}$   | 1.78 ± 0.40 | 1.43 ± 0.23 | 1.45 ± 0.21 | 1.45 ± 0.21 | 1.45 ± 0.21 | 1.45 ± 0.21 |
| $\mathcal{D}_{PCA}$  | 1.47 ± 0.60 | 1.40 ± 0.37 | 1.45 ± 0.34 | 1.45 ± 0.34 | 1.45 ± 0.34 | 1.45 ± 0.34 |
| $\mathcal{D}_{PCA2}$ | 1.72 ± 0.78 | 1.56 ± 0.55 | 1.59 ± 0.49 | 1.59 ± 0.49 | 1.59 ± 0.49 | 1.59 ± 0.49 |
| $\mathcal{D}_{TC}$   | 1.48 ± 0.62 | 1.42 ± 0.40 | 1.47 ± 0.37 | 1.47 ± 0.37 | 1.47 ± 0.37 | 1.47 ± 0.37 |

  

| (b) $STD_{ \partial T_g / \partial x }$ [%] |        |        |        |        |        |        |
|---------------------------------------------|--------|--------|--------|--------|--------|--------|
|                                             | 6      |        | 13     |        | 20     |        |
|                                             | 6      | 13     | 6      | 13     | 6      | 13     |
| Mis.                                        | 0 ± 0  | 0 ± 0  | 0 ± 0  | 0 ± 0  | 0 ± 0  | 0 ± 0  |
| $\mathcal{D}_{MI}$                          | 28 ± 8 | 15 ± 4 | 11 ± 3 | 11 ± 3 | 11 ± 3 | 11 ± 3 |
| $\mathcal{D}_{PCA}$                         | 12 ± 3 | 8 ± 2  | 7 ± 2  | 7 ± 2  | 7 ± 2  | 7 ± 2  |
| $\mathcal{D}_{PCA2}$                        | 10 ± 2 | 7 ± 2  | 6 ± 1  | 6 ± 1  | 6 ± 1  | 6 ± 1  |
| $\mathcal{D}_{TC}$                          | 12 ± 3 | 8 ± 2  | 7 ± 2  | 7 ± 2  | 7 ± 2  | 7 ± 2  |

Table S4: DCE-ABDOMEN. Mean and standard deviation over all subjects for all evaluation measures and control point spacings 32 mm, 64 mm and 128 mm.

| (a) mTRE [mm]        |             |             |             |             |             |             |
|----------------------|-------------|-------------|-------------|-------------|-------------|-------------|
|                      | 32          |             | 64          |             | 128         |             |
|                      | 32          | 64          | 32          | 64          | 32          | 64          |
| Mis.                 | 8.49 ± 4.54 | 8.49 ± 4.54 | 8.49 ± 4.54 | 8.49 ± 4.54 | 8.49 ± 4.54 | 8.49 ± 4.54 |
| $\mathcal{D}_{MI}$   | 6.73 ± 2.02 | 6.46 ± 2.32 | 6.47 ± 2.37 | 6.47 ± 2.37 | 6.47 ± 2.37 | 6.47 ± 2.37 |
| $\mathcal{D}_{PCA}$  | 6.21 ± 2.25 | 6.11 ± 2.32 | 6.24 ± 2.37 | 6.24 ± 2.37 | 6.24 ± 2.37 | 6.24 ± 2.37 |
| $\mathcal{D}_{PCA2}$ | 5.89 ± 2.23 | 5.99 ± 2.17 | 6.18 ± 2.27 | 6.18 ± 2.27 | 6.18 ± 2.27 | 6.18 ± 2.27 |
| $\mathcal{D}_{TC}$   | 7.01 ± 1.82 | 6.18 ± 2.40 | 6.23 ± 2.30 | 6.23 ± 2.30 | 6.23 ± 2.30 | 6.23 ± 2.30 |

  

| (b) $STD_{ \partial T_g / \partial x }$ [%] |        |       |       |       |       |       |
|---------------------------------------------|--------|-------|-------|-------|-------|-------|
|                                             | 32     |       | 64    |       | 128   |       |
|                                             | 32     | 64    | 32    | 64    | 32    | 64    |
| Mis.                                        | 0 ± 0  | 0 ± 0 | 0 ± 0 | 0 ± 0 | 0 ± 0 | 0 ± 0 |
| $\mathcal{D}_{MI}$                          | 20 ± 9 | 4 ± 2 | 1 ± 1 | 1 ± 1 | 1 ± 1 | 1 ± 1 |
| $\mathcal{D}_{PCA}$                         | 11 ± 4 | 4 ± 2 | 1 ± 0 | 1 ± 0 | 1 ± 0 | 1 ± 0 |
| $\mathcal{D}_{PCA2}$                        | 6 ± 3  | 2 ± 1 | 0 ± 0 | 0 ± 0 | 0 ± 0 | 0 ± 0 |
| $\mathcal{D}_{TC}$                          | 11 ± 4 | 4 ± 2 | 1 ± 0 | 1 ± 0 | 1 ± 0 | 1 ± 0 |

  

| (c) 90% $\sqrt{CRLB}$ $K^{trans}$ [ $min^{-1}$ ] |             |             |             |             |             |             |
|--------------------------------------------------|-------------|-------------|-------------|-------------|-------------|-------------|
|                                                  | 32          |             | 64          |             | 128         |             |
|                                                  | 32          | 64          | 32          | 64          | 32          | 64          |
| Mis.                                             | 2.84 ± 2.30 | 2.84 ± 2.30 | 2.84 ± 2.30 | 2.84 ± 2.30 | 2.84 ± 2.30 | 2.84 ± 2.30 |
| $\mathcal{D}_{MI}$                               | 3.85 ± 2.41 | 3.64 ± 4.13 | 2.54 ± 2.58 | 2.54 ± 2.58 | 2.54 ± 2.58 | 2.54 ± 2.58 |
| $\mathcal{D}_{PCA}$                              | 1.69 ± 1.48 | 1.52 ± 1.18 | 1.46 ± 1.09 | 1.46 ± 1.09 | 1.46 ± 1.09 | 1.46 ± 1.09 |
| $\mathcal{D}_{PCA2}$                             | 1.17 ± 0.87 | 1.27 ± 0.92 | 1.38 ± 1.16 | 1.38 ± 1.16 | 1.38 ± 1.16 | 1.38 ± 1.16 |
| $\mathcal{D}_{TC}$                               | 1.78 ± 1.74 | 1.87 ± 1.81 | 1.54 ± 1.38 | 1.54 ± 1.38 | 1.54 ± 1.38 | 1.54 ± 1.38 |
